# Supplementary material for: GloUCP: A global 1 km spatially continuous urban canopy parameters for the WRF model
Source: Copernicus journal article supplement (doi:10.5194/essd-2024-408), 2024-10-28
Supplement: Supplementary file 1 [file essd-2024-408-supplement.pdf]

Supporting Information for

## **GloUCP: A global 1 km spatially continuous urban canopy parameters for the WRF model**

Weilin Liao<sup>1,2</sup>, Yanman Li<sup>1</sup>, Xiaoping Liu<sup>1,3</sup>, Yuhao Wang<sup>1</sup>, Yangzi Che<sup>1</sup>, Ledi Shao<sup>1</sup>, Guangzhao Chen<sup>1</sup>, Hua Yuan<sup>3,4</sup>, Ning Zhang<sup>5</sup>, Fei Chen<sup>6</sup>

<sup>1</sup>Guangdong Key Laboratory for Urbanization and Geo-simulation, School of Geography and Planning, Sun Yat-sen University, Guangzhou, 510275, China

<sup>2</sup>Key Laboratory of Urban Meteorology, China Meteorological Administration, Beijing, 100089, China

<sup>3</sup>Southern Marine Science and Engineering Guangdong Laboratory (Zhuhai), Zhuhai, 519082, China

<sup>4</sup>School of Atmospheric Sciences, Sun Yat-sen University, Guangzhou, 510275, China

<sup>5</sup>School of Atmospheric Sciences, Nanjing University, Nanjing, 210023, China

<sup>6</sup>Division of Environment and Sustainability, The Hong Kong University of Science and Technology, Hong Kong, 999077, China

*Correspondence to:* Xiaoping Liu (liuxp3@mail.sysu.edu.cn)

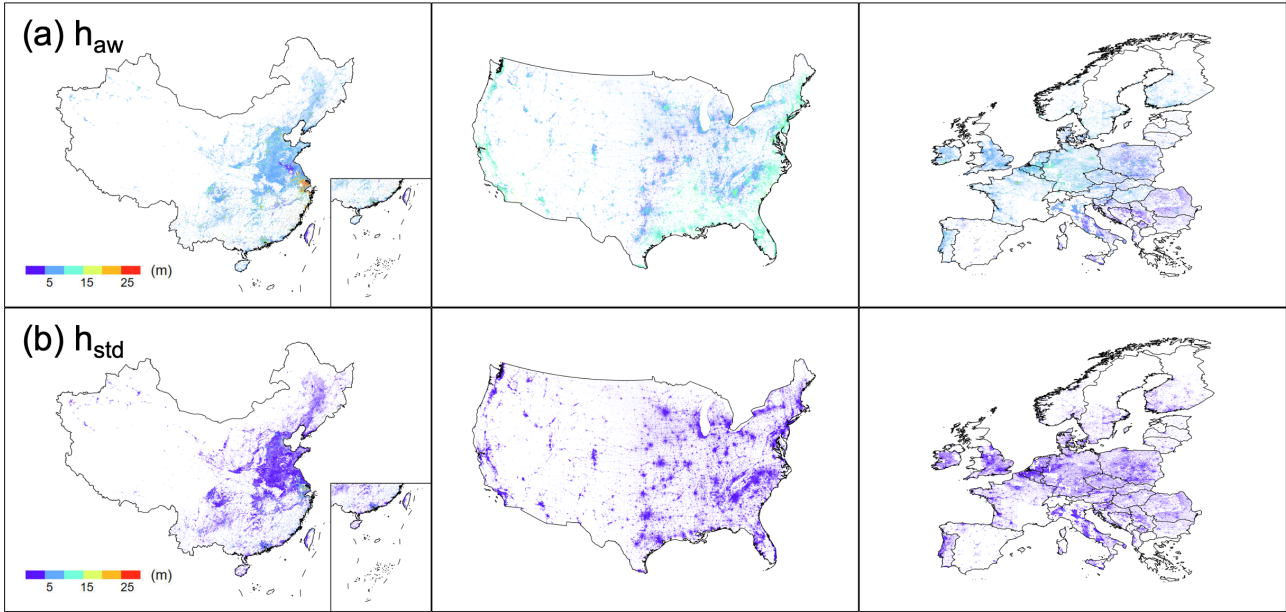

**Figure S1. The spatial distribution of (a) area weighted mean building height and (b) standard deviation of building height in China, the contiguous United States, and Europe.**

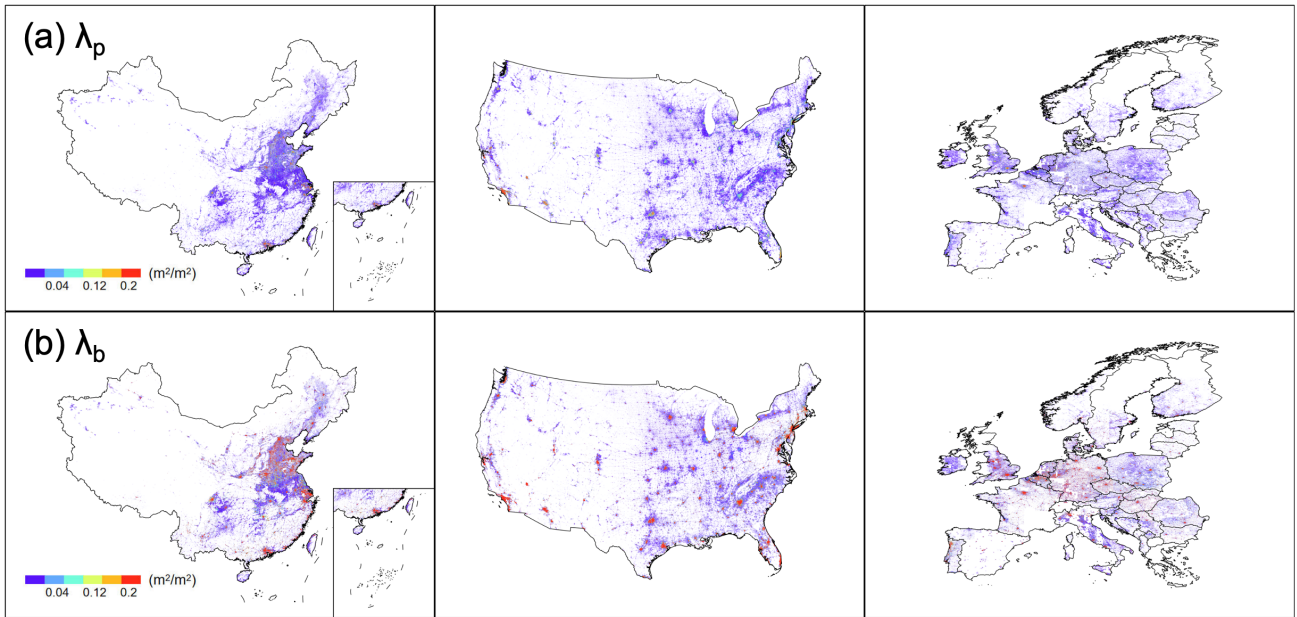

**Figure S2. The spatial distribution of (a) plan area fraction and (b) building surface to plan area ratio in China, the contiguous United States, and Europe.**

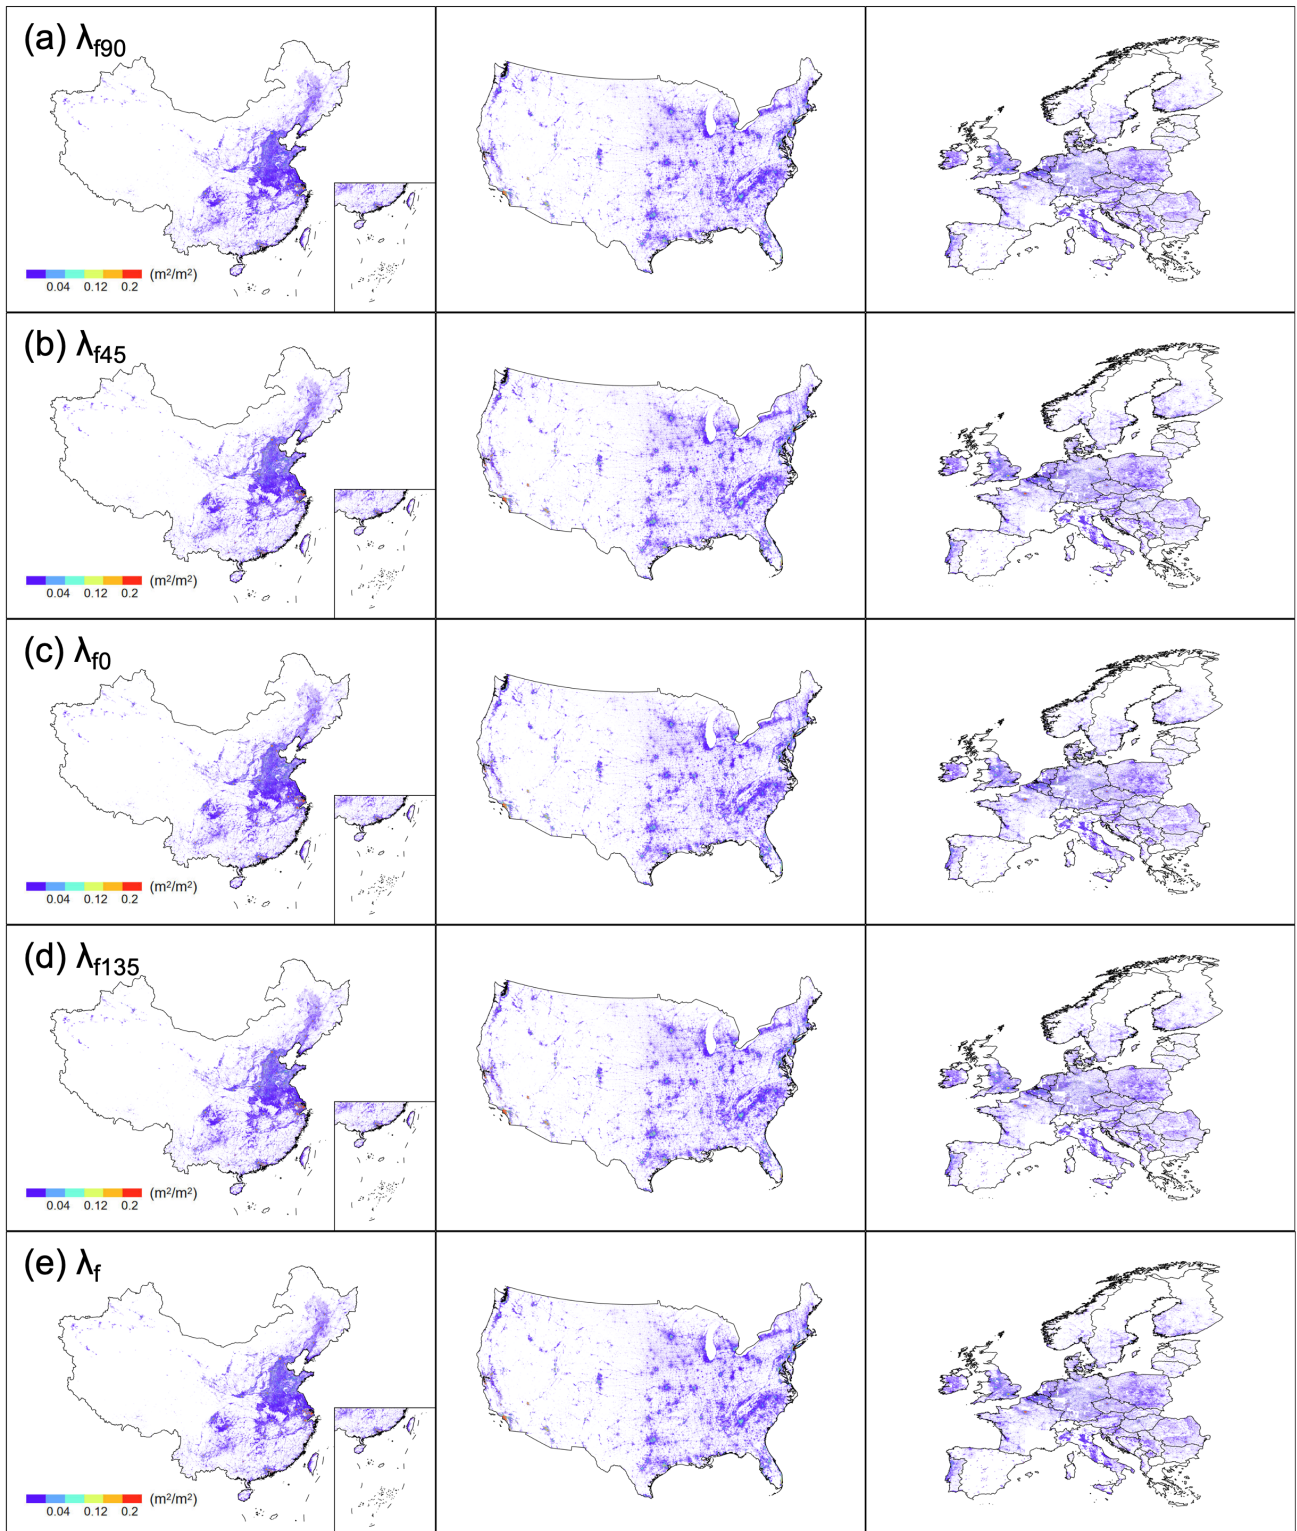

**Figure S3. The spatial distribution of frontal area index for (a) northward, (b) northeastward, (c) eastward, (d) southeastward, and (e) the average frontal area index in China, the contiguous United States, and Europe.**

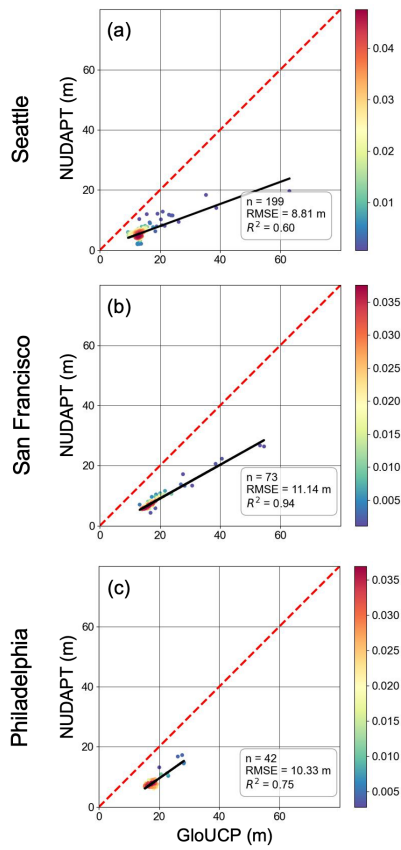

**Figure S4. Pixel-scale comparison of mean building heights between GloUCP and NUDAPT across three representative cities in the United States.** The red dashed line represents the 1:1 line, while the black solid line indicates the fitted regression line.
